# Supplementary material for: The relationships between step count and all-cause mortality and cardiovascular events: A dose–response meta-analysis
Source: PubMed Central journal article supplement — J Sport Health Sci. 2021 Sep 20;10(6):620–8. doi: 10.1016/j.jshs.2021.09.004 (PMC8724621; doi:10.1016/j.jshs.2021.09.004), 2021-09-20
Supplement: mmc2.pdf [file mmc2.pdf]

The relationship between step count and all-cause mortality and cardiovascular events:  
A dose–response meta-analysis

Mingxin Sheng<sup>a</sup>, Junyue Yang<sup>a</sup>, Min Bao<sup>a</sup>, Tianzhi Chen<sup>b</sup>, Ruixue Cai<sup>a</sup>, Na Zhang<sup>a</sup>, Hongling Chen<sup>a</sup>,  
Minqi Liu<sup>a</sup>, Xueyu Wu<sup>a</sup>, Bowen Zhang<sup>a</sup>, Yiting Liu<sup>a</sup>, Jianqian Chao<sup>a,\*</sup>

<sup>a</sup> Key Laboratory of Environmental Medicine Engineering of Ministry of Education, Department of  
Epidemiology and Biostatistics, School of Public Health, Southeast University, Nanjing 210009, China

<sup>b</sup> Department of Health Policy and Management, School of Public Health, Peking University, Beijing  
100191, China

\* Corresponding author.

E-mail address: chaoseu@163.com (J.Q. Chao)

Running head: Step count and cardiovascular events

# SUPPLEMENTAL MATERIAL

## Supplementary File 1

### *Literature search strategy*

Cochrane Central Register of Controlled Trials (Issue 7 of 12, July 2021)

((step count) OR (steps per day) OR (daily steps)) AND ((cardiovascular disease) OR (cardiovascular events) OR (heart disease) OR (cerebrovascular accident) OR (angina) OR (stroke) OR (myocardial infarction) OR (heart infarction) OR (ischemic heart disease)) -in Abstract

### EMBASE

('step count'/exp OR 'step count' OR 'daily steps' OR 'steps per day') AND ('heart disease'/exp OR 'heart disease' OR 'cardiovascular disease'/exp OR 'cardiovascular disease' OR 'cardiovascular events' OR 'heart infarction'/exp OR 'heart infarction' OR 'ischemic heart disease'/exp OR 'ischemic heart disease' OR 'cerebrovascular accident'/exp OR 'cerebrovascular accident' OR 'heart failure'/exp OR 'heart failure' OR 'angina'/exp OR 'angina' OR 'stroke'/exp OR 'stroke' OR 'myocardial infarction' OR 'coronary artery disease'/exp OR 'coronary artery disease' OR 'death'/exp OR 'death' OR 'cause of death'/exp OR 'cause of death' OR 'mortality'/exp OR 'mortality')

### OVID

9 Resources selected: 1) Journals@Ovid Full Text <July 07, 2021>, 2) JBI EBP Database <Current to June 30, 2021>, 3) EBM Reviews-ACP Journal Club <1991 to June 2021>, 4) EBM Reviews-Cochrane Central Register of Controlled Trials <June 2021>, 5) EBM Reviews-Cochrane Database of Systematic Reviews <2005 to July 8, 2021>, 6) Embase <1974 to 2021 July 08>, 7) Ovid Emcare <1995 to 2021 Week 26>, 8) Ovid MEDLINE(R) and Epub Ahead of Print, In-Process, In-Data-Review & Other Non-Indexed Citations, Daily and Versions(R) <1946 to July 08, 2021>, 9) APA PsycInfo <1987 to July Week 1 2021>.

#1 (cardiovascular disease or myocardial infarction or coronary or cardiovascular events or heart disease or ischemic heart disease or cerebrovascular accident or angina or stroke or heart infarction or death or mortality or cause of death or all-cause of death or all-cause mortality).af.

#2 (cohort or prospective or trial or clinical trial or follow-up).af.

#3 (step count or steps per day or daily steps).af.

#1 and #2 and #3

### PubMed

((step count) OR (steps per day) OR (daily steps)) AND ((cardiovascular disease) OR (cardiovascular events) OR (heart disease) OR (cerebrovascular accident) OR (angina) OR (stroke) OR (myocardial infarction) OR (heart infarction) OR (ischemic heart disease) OR (mortality) OR (cause of death) OR (all-cause mortality) OR (all-cause death) OR (death)) AND (cohort OR prospective OR trial OR (clinical trial) OR (follow-up))

### Scopus

(( "step count" OR "steps per day" OR "daily steps" ) AND ( "cardiovascular disease" OR "cardiovascular events" OR "heart disease" OR "ischemic heart disease" OR

"cerebrovascular accident" OR arrhythmias OR "heart failure" OR "myocardial ischemia" OR stroke OR "myocardial infarction" OR mortality OR "cause of death" OR "all-cause of death" OR "all-cause mortality" OR death ) AND ( cohort OR prospective OR "clinical trial" OR "follow-up" ) ) AND ( LIMIT-TO ( LANGUAGE , "English" ) ) AND ( LIMIT-TO ( EXACTKEYWORD , "Adult" ) )

#### Web of Science

TS = (("step count" OR "steps per day" OR daily steps ) AND ( "cardiovascular disease" OR "cardiovascular events" OR "heart disease" OR "ischemic heart disease" OR cerebrovascular accident OR angina OR stroke OR "heart infarction" OR myocardial infarction OR mortality OR "cause of death" OR "all-cause of death" OR "all-cause mortality" OR death) AND (cohort OR prospective OR trial OR clinical trial OR follow-up))

## **Supplementary File 2**

### *Literature Search result*

After the exclusion of duplicates and studies that did not fulfill the inclusion criteria, 23 remaining articles seemed to be relevant for this meta-analysis. After evaluating the full texts of these 23 publications, we excluded 7 articles as follows:

Two articles<sup>1, 2</sup> were excluded owing to lack of sufficient data for estimation of RRs. Four articles<sup>3-6</sup> were excluded because they did not separately report step count. We also excluded one article<sup>7</sup> because only its abstract was written in English.

The final meta-analysis included 16 publications. Among these 16 publications, 12 publications provided statistical effects relevant to the meta-analyses on all-cause mortality, 4 articles on total CVD, 1 article on stroke<sup>8</sup>. One article<sup>9</sup> was a randomized controlled trial, and others were prospective cohort studies.

We included 3 conference papers in the final meta-analysis.<sup>10-12</sup> Indeed, we could not assure the quality and reliability of these findings without peer review. However, journals that sponsored these conferences had a high impact factor, and sufficient data we need was reported on the meeting abstract. Therefore, we decided to include these conference papers.

**Supplementary Table 1. Step count and all-cause mortality.**

| Study                                    | Country;<br>Study name;<br>No of participants;<br>No of cases                                                                                           | Age at<br>baseline<br>(years),<br>Year of<br>baseline<br>assessment,<br>Follow-up<br>(years) | Case ascertainment                                               | Pedometer or<br>Accelerometer,<br>Device(s), Location,<br>Duration                                          | Number of<br>steps per day                                     | Corresponding<br>hazard ratio<br>(95% CI)                                         | Covariates                                                                                                                                                                                                       | Quality<br>assessment* |
|------------------------------------------|---------------------------------------------------------------------------------------------------------------------------------------------------------|----------------------------------------------------------------------------------------------|------------------------------------------------------------------|-------------------------------------------------------------------------------------------------------------|----------------------------------------------------------------|-----------------------------------------------------------------------------------|------------------------------------------------------------------------------------------------------------------------------------------------------------------------------------------------------------------|------------------------|
| Dwyer et al. (2015) <sup>13</sup>        | Australia; the Tasped Prospective Cohort Study; <i>n</i> = 2576 (1226 men, 1350 women); 219 cases                                                       | >18, 2000–05, 10.0 years                                                                     | The Australian National Death Index                              | Pedometer, Digi-Walker SW-200 (YAMASA, Tokyo, Japan), HJ-003 and HJ-102(Omron, Tokyo, Japan), waist, 7 days | 0–5550<br>5551–8000<br>8001–10000<br>10001–3500<br>13501–39164 | 1<br>0.43 (0.30–0.62)<br>0.25 (0.16–0.38)<br>0.24 (0.15–0.37)<br>0.10 (0.05–0.18) | Age, sex, BMI at baseline, total energy intake from all sources(kJ) at baseline, current smoking status at baseline, alcohol consumption (g/day) at baseline, education at baseline and study cohort             | 8                      |
| Fox et al. (2015) <sup>14</sup>          | The United Kingdom; project OPAL (Older People and Active Living); <i>n</i> = 213(109 men, 104 women); 33 cases                                         | ≥70, 2007–08, 4.2years                                                                       | Medical records, death certificates                              | Accelerometer, GTIMs (ActiGraph, Pensacola, FL, USA) waist,7 days                                           | <3196<br>3196–5170<br>>5170                                    | 7.69 (1.43–41.20)<br>3.99 (0.80–20.01)<br>1                                       | Age, gender, educational attainment, IMD, weight status, GP Management System and number of self-reported chronic illnesses at baseline                                                                          | 9                      |
| Yamamoto et al. (2018) <sup>15</sup>     | Japan; study on the relationship between environmental factors and health outcomes in Niigata City, Japan; <i>n</i> = 419 (228 men,191 women); 76 cases | 71, 1998–99, 9.8 years                                                                       | Medical records, death certificates                              | Pedometer, EC-100S (YAMASA, Tokyo, Japan), waist,7 days                                                     | <4503<br>4503–6110<br>6111–7971<br>>7972                       | 1<br>0.81(0.43–1.54)<br>1.26(0.70–2.26)<br>0.46(0.22–0.96)                        | Sex, body mass index (continuous variable), cigarette smoking (never-smokers, past smokers, current smokers), alcohol intake (non, 1–2 times/week, 3–5 times/week, 6–7 times/week), and medication use (yes, no) | 8                      |
| German et al. (2019) <sup>10</sup>       | The United States; the 2005–2006 NHANES survey; <i>n</i> = 4055 (1914 men, 2141 women); 474 cases                                                       | 45.9, 2005–06, 12 years                                                                      | The National Death Index                                         | Accelerometer, AM-7164 (ActiGraph, Pensacola, FL, USA), right hip, 7 days                                   | <2500<br>2500–4999<br>5000–7500<br>7500–9999<br>>10000         | 1<br>0.50(0.36–0.68)<br>0.27(0.19–0.38)<br>0.20(0.10–0.38)<br>0.33(0.15–0.69)     | Some adjustment factor <sup>a</sup>                                                                                                                                                                              | 7                      |
| Jefferis et al. (2019, UK) <sup>16</sup> | The United Kingdom; the British Regional Heart Study; <i>n</i> = 1181 men; 194 cases                                                                    | 71–92, 2010–12, 5.0 years                                                                    | National Health Service central registers                        | Accelerometer GT3x (ActiGraph, Pensacola, FL, USA), right hip,7 days                                        | 121–2927<br>2928–4532<br>4533–6412<br>6413–17781               | 1<br>0.63(0.43–0.93)<br>0.59(0.39–0.90)<br>0.31(0.17–0.57)                        | Age, region of residence, season of wear, accelerometer wear time, social class, alcohol use, smoking, sleep time, living alone, body mass index, mobility disability.                                           | 9                      |
| Lee et al. (2019) <sup>17</sup>          | The United States; the Women’s Health Study (WHS); <i>n</i> = 16741 women; 504 cases                                                                    | 62–101, 2011–12, 4.3 years                                                                   | Medical records, death certificates, or the National Death Index | Accelerometer, GT3X+ (ActiGraph, Pensacola, FL, USA), hip, 7 days                                           | 2128–3202<br>3992–4738<br>5493–6403<br>7580–9954               | 1<br>0.59(0.47–0.75)<br>0.54(0.41–0.72)<br>0.42(0.3–0.60)                         | Age, wear time, smoking status, alcohol use, intakes of saturated fat, fiber, fruits, and vegetables, hormone therapy, parental history of myocardial                                                            | 9                      |

|                                           |                                                                                                                                         |                                   |                                                                                            |                                                                            |                                                      |                                                            |                                                                                                                                                                                                                                                                                |   |
|-------------------------------------------|-----------------------------------------------------------------------------------------------------------------------------------------|-----------------------------------|--------------------------------------------------------------------------------------------|----------------------------------------------------------------------------|------------------------------------------------------|------------------------------------------------------------|--------------------------------------------------------------------------------------------------------------------------------------------------------------------------------------------------------------------------------------------------------------------------------|---|
|                                           |                                                                                                                                         |                                   |                                                                                            |                                                                            |                                                      |                                                            | infarction, family history of cancer, general health, history of cardiovascular disease, history of cancer, and cancer screening.                                                                                                                                              |   |
| Hansen et al. (2020) <sup>18</sup>        | Norway; a nationwide multicenter physical activity surveillance study; <i>n</i> = 2183(1026 men, 1157 women); 119cases                  | 40–85, 2008–09, 9.1 years         | The Norwegian Cause of Death Registry                                                      | Accelerometer, GT1M (ActiGraph, Pensacola, FL, USA), waist, 7 days         | 3495–5325<br>6388–7350<br>8215–9186<br>10556–13110   | 1<br>0.52(0.29–0.93)<br>0.50(0.27–0.94)<br>0.43(0.21–0.88) | Sex, wear time, VPA, education, body mass index, smoking (never/former/current), alcohol intake, and number of medical conditions, excluding deaths within first 2 y ( <i>n</i> = 9).                                                                                          | 9 |
| Oftedal et al. (2020) <sup>19</sup>       | Australia; the Hunter Community Study (HCS); <i>n</i> = 1697 (860 men, 837 women); 204 cases                                            | 55–85, 2005–08, 9.6 years         | Medical records, death certificates                                                        | Pedometer Digi-Walker SW-200 (YAMASA, Tokyo, Japan), waist, 7 days         | Median (IQR)6678 (4689–8850)                         | 0.93(0.88–0.98) per 1000–step increment                    | Mean age and diet quality score, and reference categories ‘low income’ and ‘current smoker’.                                                                                                                                                                                   | 9 |
| Paluch et al. (2020) <sup>11</sup>        | The United States; the Coronary Artery Risk Development in Young Adults (CARDIA) study; <i>n</i> = 2027 (851 men, 1176 women); 67 cases | 45.3±3.5, 2005–06, 10.8±0.9 years | The state health department                                                                | Accelerometer, 7164 (ActiGraph, Pensacola, FL, USA), hip, >4 days          | 5898–7452<br>8553–9489<br>10501–11472<br>12904–15660 | 1<br>0.43(0.20–0.90)<br>0.83(0.45–1.56)<br>0.48(0.23–0.99) | Wear time, age, sex, race, max education, center, healthy eating index, smoking status, alcohol intake, history of cardiovascular disease, type 2 diabetes, hypertension, obesity, hypercholesterolemia.                                                                       | 7 |
| Saint-Maurice et al. (2020) <sup>20</sup> | The United States; the National Health and Nutrition Examination Survey (NHANES); <i>n</i> = 4840 (2405 men, 2435 women); 1165 cases    | >40, 2003–06, 10.1 years          | The National Death Index                                                                   | Accelerometer, 7164 (ActiGraph, Pensacola, FL, USA), hip, 7 days           | 4000<br>8000<br>12000                                | 1<br>0.49(0.44–0.55)<br>0.35(0.28–0.45)                    | steps per day, sex, age, diet quality, race/ethnicity, body mass index, education, alcohol consumption, smoking status, diabetes, stroke, coronary heart disease, heart failure, cancer, chronic bronchitis, emphysema, mobility limitation, and self-reported general health. | 9 |
| Mañás et al. (2021) <sup>21</sup>         | Spain; the Toledo Study for Healthy Aging (TSHA); <i>n</i> = 768 (354 men, 414 women); 89 cases                                         | 78.8 ±4.9, 2015 - 17, 5.7 years   | The Spanish National Death Index (Ministry of Health, Consumer Affairs and Social Welfare) | Accelerometer, wGT3X-BT, (ActiGraph, Pensacola, FL, USA), left hip, 7 days | 5835 ± 3445 steps/day (mean ± SD)                    | 0.87 (0.81–0.95) per additional 1000 steps                 | Accelerometer wear time (covariate excluded in the steps/min models), age, sex, BMI, education, income, marital status and comorbidities.                                                                                                                                      | 9 |
| Schneider et al. (2021) <sup>22</sup>     | The United Kingdom; the UK Biobank; <i>n</i> = 95974 (41903 men, 54071 women); 2290 cases                                               | 37–73, 2013–15, 5.5 years         | National death registries                                                                  | Accelerometer, AX3 (Axivity, Newcastle upon Tyne, UK), wrist, 7 days       | 6500<br>8000<br>9250<br>12000                        | 1<br>0.36(0.18–0.75)<br>0.29(0.13–0.64)<br>0.15(0.05–0.44) | Sex, age, BMI, and alcohol consumption                                                                                                                                                                                                                                         | 9 |

Notes: \*Quality assessment according to Newcastle-Ottawa scale (range 0 – 9) for cohort studies (see supplementary material for further details).

<sup>a</sup> Unclear, not mentioned in the meeting abstract.

Abbreviation: 95%CI = 95% confidence interval; BMI = body mass index; IMD = index of multiple deprivation; GP = general practitioner; VPA = take more vigorous intensity activity (e.g., jogging).

**Supplementary Table 2. Step count and cardiovascular disease.**

| Study                                     | Country; Study name; No of participants; No of cases                                                                                      | Age at baseline (years), Year of baseline assessment, Follow-up (years) | Case ascertainment                                                                                                                                                                                                                           | CVD incidence or mortality | Pedometer or Accelerometer, Device(s), Location, Duration              | Number of steps per day                          | Corresponding hazard ratio (95% CI)                                                                            | Covariates                                                                                                                                                                                                                                                                                  | Quality assessment* |
|-------------------------------------------|-------------------------------------------------------------------------------------------------------------------------------------------|-------------------------------------------------------------------------|----------------------------------------------------------------------------------------------------------------------------------------------------------------------------------------------------------------------------------------------|----------------------------|------------------------------------------------------------------------|--------------------------------------------------|----------------------------------------------------------------------------------------------------------------|---------------------------------------------------------------------------------------------------------------------------------------------------------------------------------------------------------------------------------------------------------------------------------------------|---------------------|
| Cochrane et al. (2017) <sup>9</sup>       | The United States; the LIFE (Lifestyle Interventions and Independence for Elders) Study; <i>n</i> = 1590 (521 men, 1069 women); 234 cases | 78.9±5.2, 2010–13, 2.7 years <sup>b</sup>                               | Hospital records included MI, silent MI, hospitalized angina, congestive heart failure, revascularization with bypass surgery or percutaneous angioplasty, aortic aneurysm, peripheral artery disease, stroke, and transient ischemic attack | Incidence                  | Accelerometer, GT3x (ActiGraph, Pensacola, FL, USA), hip, 7 days       | 2681 ±1475                                       | 0.90(0.85–0.96) per 500 steps                                                                                  | Accelerometer wear time, site and sex, randomization, race, age, education, living alone, and marital status, diabetes mellitus, cardiovascular disease, and antihypertensive use, ankle - brachial index, systolic and diastolic blood pressure, and Pittsburgh Sleep Quality Index score. | 9                   |
| Jefferis et al. (2019) <sup>23</sup>      | The United Kingdom; the British Regional Heart Study (BRHS); <i>n</i> = 1181 men; 122 cases                                               | 71–92, 2010–12, 4.9 years                                               | International Classification of Disease (ICD) 9 codes: MI 410–414 (ICD 10 codes I20–I25), Stroke 430–438, (ICD10 I60–69) and Heart Failure 428 (ICD10 I50); yearly reviews of primary care notes                                             | Incidence and mortality    | Accelerometer, GT3x (ActiGraph, Pensacola, FL, USA), right hip, 7 days | 121–2943<br>2944–4540<br>4541–6406<br>6407–17781 | 1.00<br>0.75(0.47–1.20)<br>0.44(0.25–0.77)<br>0.34(0.17–0.67)                                                  | Age, region of residence, season of wear, accelerometer wear time, social class, alcohol use, smoking, sleep time, living alone, BMI, mobility disability                                                                                                                                   | 9                   |
| LaCroix et al. (2020) <sup>12</sup>       | The United Kingdom; the OPACH Study; <i>n</i> = 6379 women; 175 cases                                                                     | 79±7, 2012–14, followed to March 31, 2017                               | National Death Index                                                                                                                                                                                                                         | Mortality                  | Accelerometer, GT3X+ (ActiGraph, Pensacola, FL, USA), waist, 7 days    | 2000(ref.)                                       | 1<br>0.48(0.32–0.73)<br>0.56(0.35–0.90)<br>0.25(0.11–0.54)                                                     | Age, race-ethnicity, education, smoking status, alcohol consumption, self-reported health, multimorbidity, and physical function                                                                                                                                                            | 6                   |
| Moniruzzaman et al. (2020) <sup>8</sup>   | Japan; Shiga Epidemiological Study of Subclinical Atherosclerosis (SESSA); <i>n</i> = 680 men; 145 cases                                  | 40–79, 2006–08, 5 years                                                 | The presence of CSVD was assessed in participants by brain MRI                                                                                                                                                                               | Incidence                  | Pedometer Digi-Walker DW-200 (YAMASA, Tokyo, Japan), waist, 7 days     | ≤6060<br>6061–8174<br>8175–10614<br>≥10615       | 1 <sup>a</sup><br>0.81(0.50–1.34) <sup>a</sup><br>0.52(0.30–0.89) <sup>a</sup><br>0.69(0.41–1.17) <sup>a</sup> | Adjusted for age, smoking and drinking status                                                                                                                                                                                                                                               | 9                   |
| Saint-Maurice et al. (2020) <sup>20</sup> | The United States; the National Health and Nutrition Examination Survey (NHANES); <i>n</i> = 4840 (2405 men,                              | >40, 2003–06, 10.1 years                                                | International Classification of Diseases, 10th Revision (ICD–10) codes for cardiovascular disease (CVD; ICD–10 code 053–                                                                                                                     | Mortality                  | Accelerometer, 7164 (ActiGraph, Pensacola, FL, USA), hip, 7 days       | 4000<br>8000<br>12000                            | 1<br>0.49(0.40–0.60)<br>0.35(0.24–0.52)                                                                        | Age, diet quality, sex, race-ethnicity, BMI, education, alcohol consumption, smoking status, diabetes, stroke,                                                                                                                                                                              | 9                   |



---

2435 women); 406  
cases

075)

coronary heart disease,  
heart failure, cancer,  
chronic bronchitis,  
emphysema, mobility  
limitation, and self-reported  
general health.

---

Notes: \*Quality assessment according to Newcastle-Ottawa scale (range 0 – 9) for cohort studies (see supplementary material for further details).

<sup>a</sup> Odds ratio with 95%CI

<sup>b</sup> Clinical Trial

Abbreviation: 95%CI = 95% confidence interval; BMI = body mass index; CVD = cardiovascular diseases; CSVD = cerebral small vessel disease; ICD = international classification of diseases; MI = myocardial infarction; MRI = magnetic resonance imaging. .

**Supplementary Table 3. Stratified analysis on associations of step count with risk of all-cause mortality and CVD.**

|                                                    | <i>n</i>  | RR (95%CI) <sup>a</sup> | <i>I</i> <sup>2</sup> (%) <sup>b</sup> | <i>p</i> <sup>c</sup> |
|----------------------------------------------------|-----------|-------------------------|----------------------------------------|-----------------------|
| <b>All-cause mortality</b>                         | <b>12</b> |                         |                                        |                       |
| <i>Location</i>                                    |           |                         |                                        |                       |
| the United States                                  | 4         | 0.86 (0.84–0.87)        | 0.0                                    | 0.673                 |
| the United Kingdom                                 | 3         | 0.74 (0.62–0.89)        | 67.1                                   | 0.048                 |
| Europe                                             | 2         | 0.87 (0.82–0.93)        | 0.0                                    | 0.863                 |
| Australia                                          | 2         | 0.94 (0.91–0.97)        | 0.0                                    | 0.760                 |
| Japan                                              | 1         | 0.93 (0.84–1.03)        | –                                      | –                     |
| <i>Sex</i>                                         |           |                         |                                        |                       |
| Male and female                                    | 10        | 0.88 (0.84–0.92)        | 72.0                                   | 0.000                 |
| Male                                               | 1         | 0.84 (0.77–0.91)        | –                                      | –                     |
| Female                                             | 1         | 0.85 (0.80–0.90)        | –                                      | –                     |
| <i>Follow-up duration</i>                          |           |                         |                                        |                       |
| >5 years                                           | 9         | 0.88 (0.85–0.92)        | 72.5                                   | 0.000                 |
| ≤5 years                                           | 3         | 0.84 (0.80–0.89)        | 12.7                                   | 0.318                 |
| <i>Reduce chance of reverse causality</i>          |           |                         |                                        |                       |
| Yes                                                | 7         | 0.89 (0.86–0.93)        | 53.7                                   | 0.044                 |
| No                                                 | 3         | 0.75 (0.61–0.91)        | 75.8                                   | 0.016                 |
| Unclear                                            | 2         | 0.87 (0.83–0.91)        | 0.0                                    | 0.384                 |
| <b>All-cause mortality (only by accelerometer)</b> | <b>9</b>  |                         |                                        |                       |
| <i>Location</i>                                    |           |                         |                                        |                       |
| the United States                                  | 4         | 0.86 (0.84–0.87)        | 0.0                                    | 0.673                 |
| the United Kingdom                                 | 3         | 0.74 (0.62–0.89)        | 67.1                                   | 0.048                 |
| Europe                                             | 2         | 0.87 (0.82–0.93)        | 70.0                                   | 0.863                 |
| <i>Sex</i>                                         |           |                         |                                        |                       |
| Male and female                                    | 7         | 0.85 (0.82–0.89)        | 45.2                                   | 0.090                 |
| Male                                               | 1         | 0.84 (0.77–0.91)        | –                                      | –                     |
| Female                                             | 1         | 0.85 (0.80–0.90)        | –                                      | –                     |
| <i>Follow-up time</i>                              |           |                         |                                        |                       |
| >5 years                                           | 6         | 0.86 (0.83–0.89)        | 41.3                                   | 0.13                  |
| ≤5 years                                           | 3         | 0.84 (0.80–0.89)        | 12.7                                   | 0.318                 |
| <i>Location of accelerometer</i>                   |           |                         |                                        |                       |
| Waist/hip                                          | 8         | 0.86(0.84–0.87)         | 0.0                                    | 0.703                 |
| Wrist                                              | 1         | 0.68(0.57–0.81)         | –                                      | –                     |
| <i>Reduce chance of reverse causality</i>          |           |                         |                                        |                       |
| Yes                                                | 4         | 0.86 (0.82–0.89)        | 0.0                                    | 0.875                 |
| No                                                 | 3         | 0.75 (0.61–0.91)        | 75.8                                   | 0.016                 |
| Unclear                                            | 2         | 0.87 (0.83–0.91)        | 0.0                                    | 0.384                 |
| <b>CVD</b>                                         | <b>5</b>  |                         |                                        |                       |
| <i>Location</i>                                    |           |                         |                                        |                       |
| the United States                                  | 2         | 0.93 (0.91–0.94)        | 4.0                                    | 0.307                 |
| the United Kingdom Japan                           | 2         | 0.94 (0.91–0.97)        | 13.5                                   | 0.282                 |

|                                           |   |                  |      |       |
|-------------------------------------------|---|------------------|------|-------|
|                                           | 1 | 0.98 (0.96–1.00) | –    | –     |
| <i>Sex</i>                                |   |                  |      |       |
| Male and female                           | 2 | 0.93 (0.91–0.94) | 4.0  | 0.307 |
| Male                                      | 2 | 0.97 (0.94–1.00) | 61.9 | 0.105 |
| Female                                    | 1 | 0.92 (0.88–0.97) | –    | –     |
| <i>Follow-up time</i>                     |   |                  |      |       |
| >5 years                                  | 1 | 0.93 (0.92–0.95) | –    | –     |
| ≤5 years                                  | 4 | 0.94 (0.91–0.98) | 74.0 | 0.009 |
| <i>Type of wearable devices</i>           |   |                  |      |       |
| Pedometer                                 | 1 | 0.98 (0.96–1.00) | –    | –     |
| Accelerometer                             | 4 | 0.93 (0.92–0.94) | 0.0  | 0.392 |
| <i>Endpoints</i>                          |   |                  |      |       |
| Total CVD                                 | 4 | 0.93 (0.92–0.94) | 0.0  | 0.392 |
| Single CVD endpoint                       | 1 | 0.98 (0.96–1.00) | –    | –     |
| <i>Reduce chance of reverse causality</i> |   |                  |      |       |
| Yes                                       | 1 | 0.95 (0.92–0.98) | –    | –     |
| No                                        | 3 | 0.94 (0.90–0.98) | 89.1 | 0.000 |
| Unclear                                   | 1 | 0.92 (0.88–0.97) | –    | –     |

Notes: <sup>a</sup> Obtained from the random-effects model

<sup>b</sup> Inconsistency- percentage of variation across studies due to heterogeneity

<sup>c</sup> Obtained from the *Q* test

Abbreviation: RR = relative risk- 95%CI = 95% confidence interval; CVD = cardiovascular diseases.

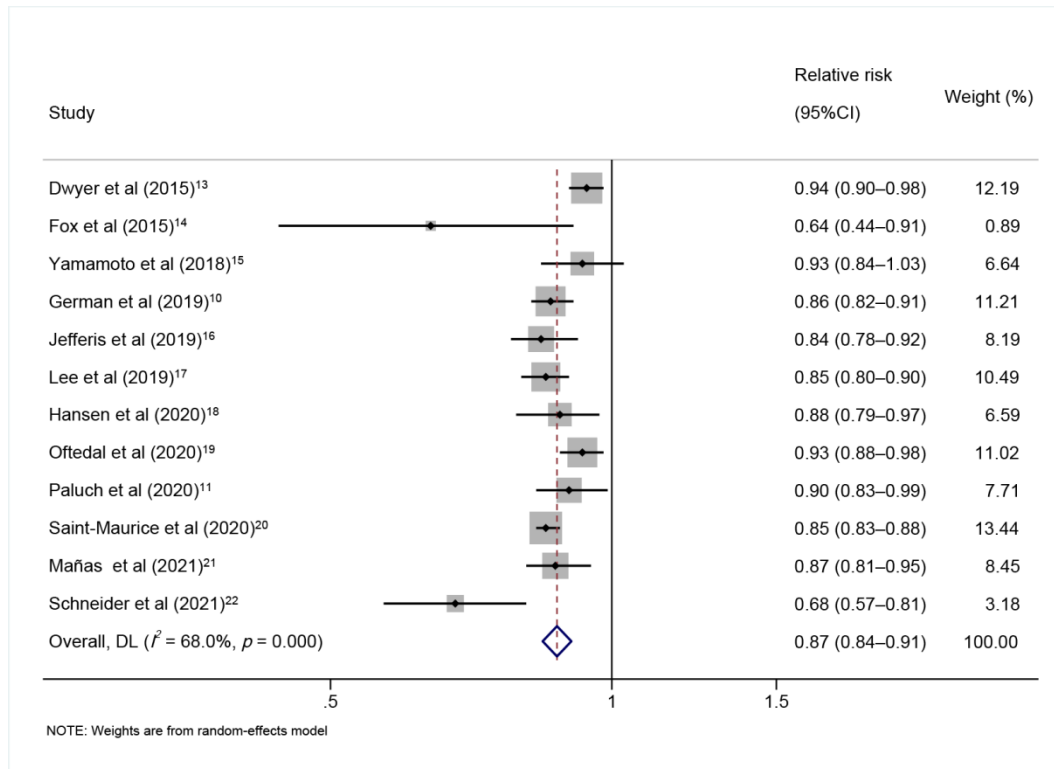

**Supplementary Fig. 1.** Forest plot of step count and risk of all - cause mortality per 1000-step increment.

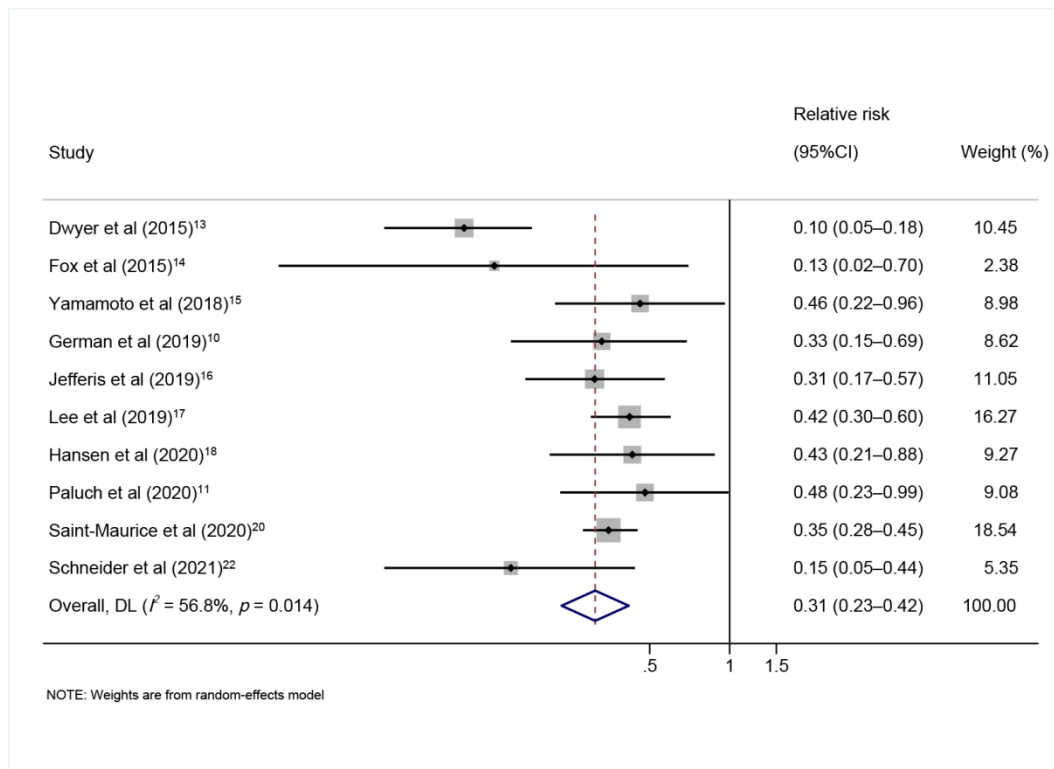

**Supplementary Fig. 2** Step count and all-cause mortality, highest vs. lowest analysis.

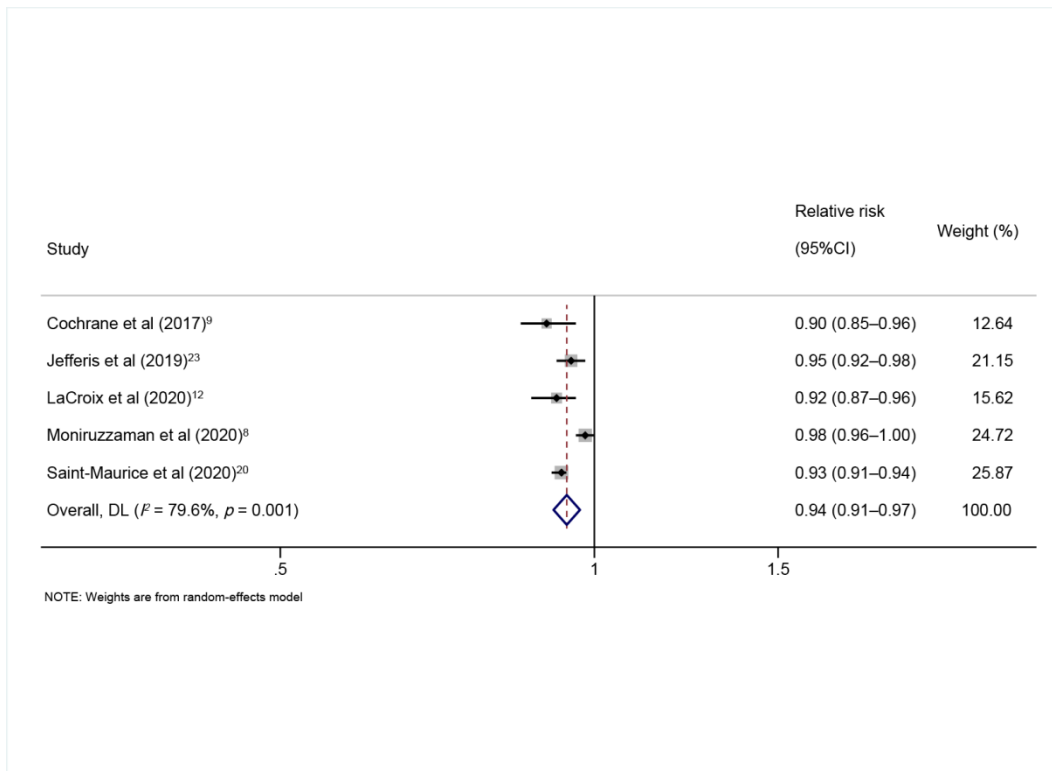

**Supplementary Fig. 3.** Forest plot of step count and risk of cardiovascular disease per 500-step increment.

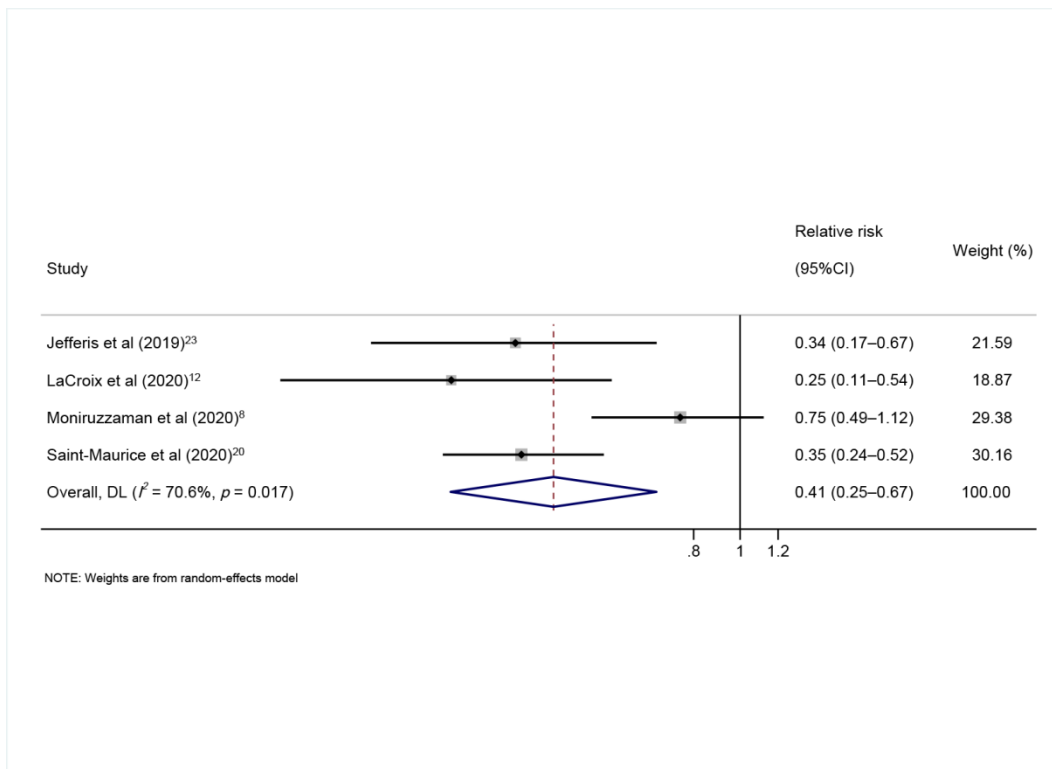

**Supplementary Fig. 4.** Step count and CVD, highest vs. lowest analysis.

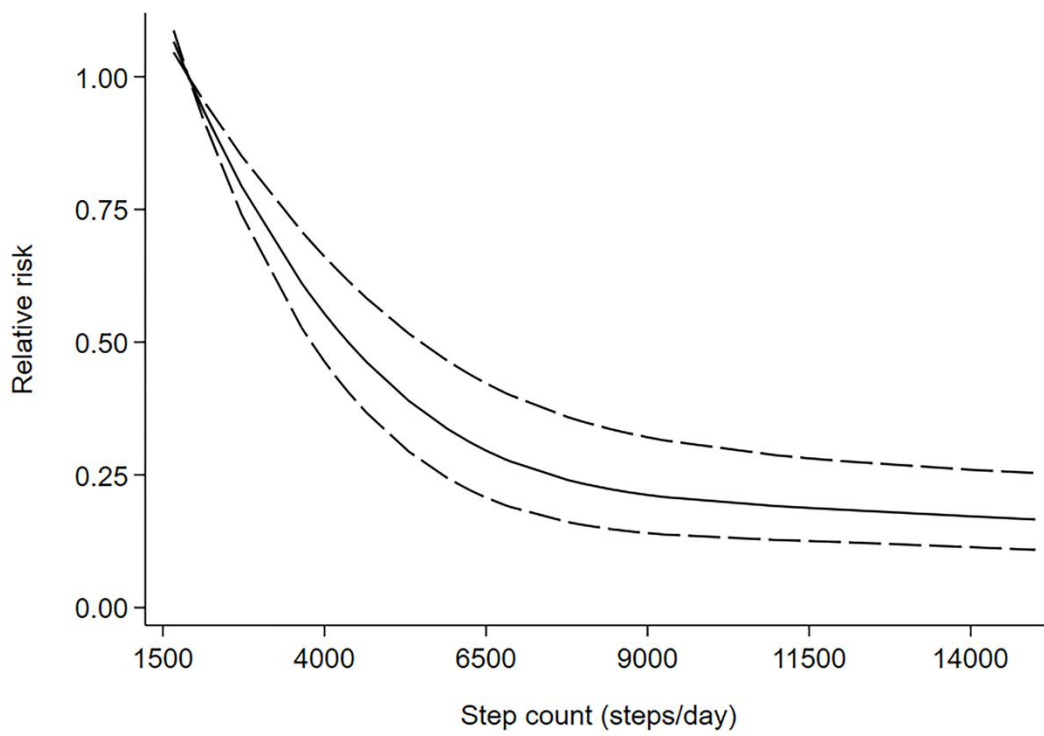

**Supplementary Fig. 5** Non-linear dose–response analysis of step count and all-cause mortality by accelerometer.

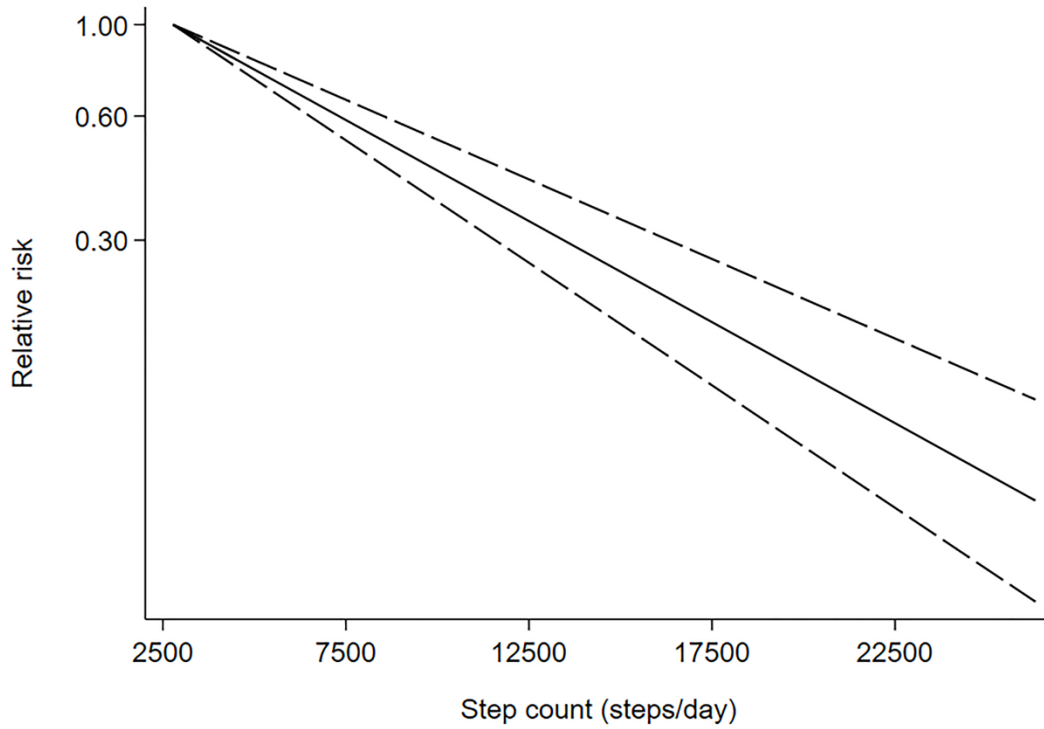

**Supplementary Fig. 6** Linear dose–response analysis of step count and all-cause mortality by pedometer.

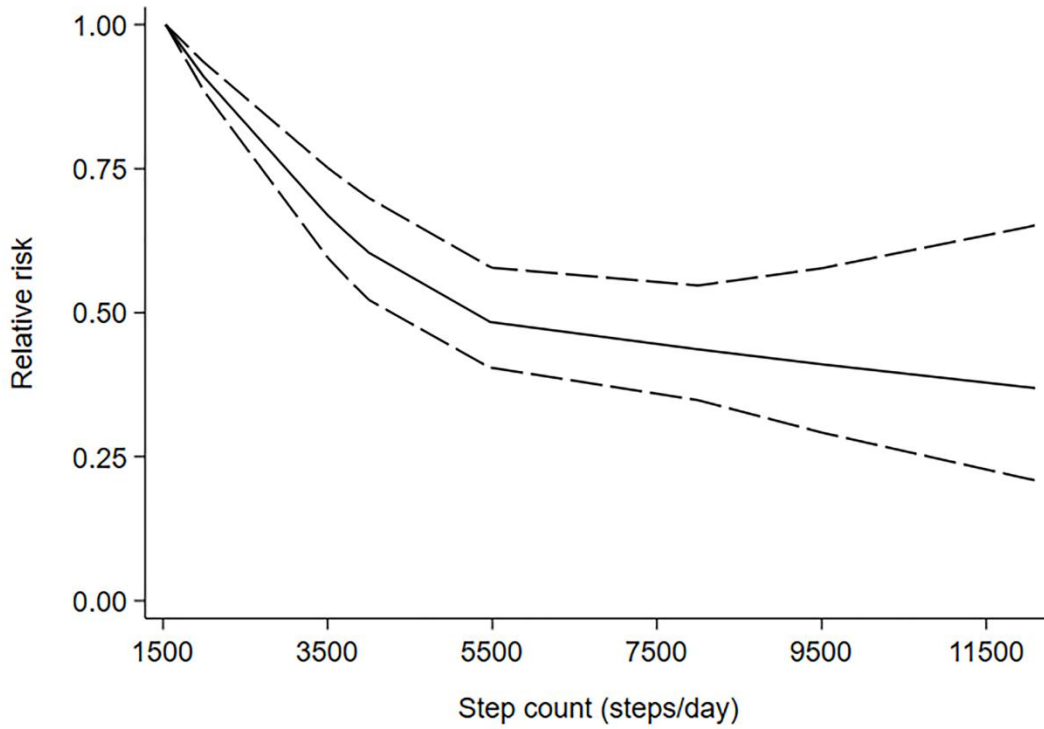

**Supplementary Fig. 7** Non-linear dose–response analysis of step count and cardiovascular events

by accelerometer.

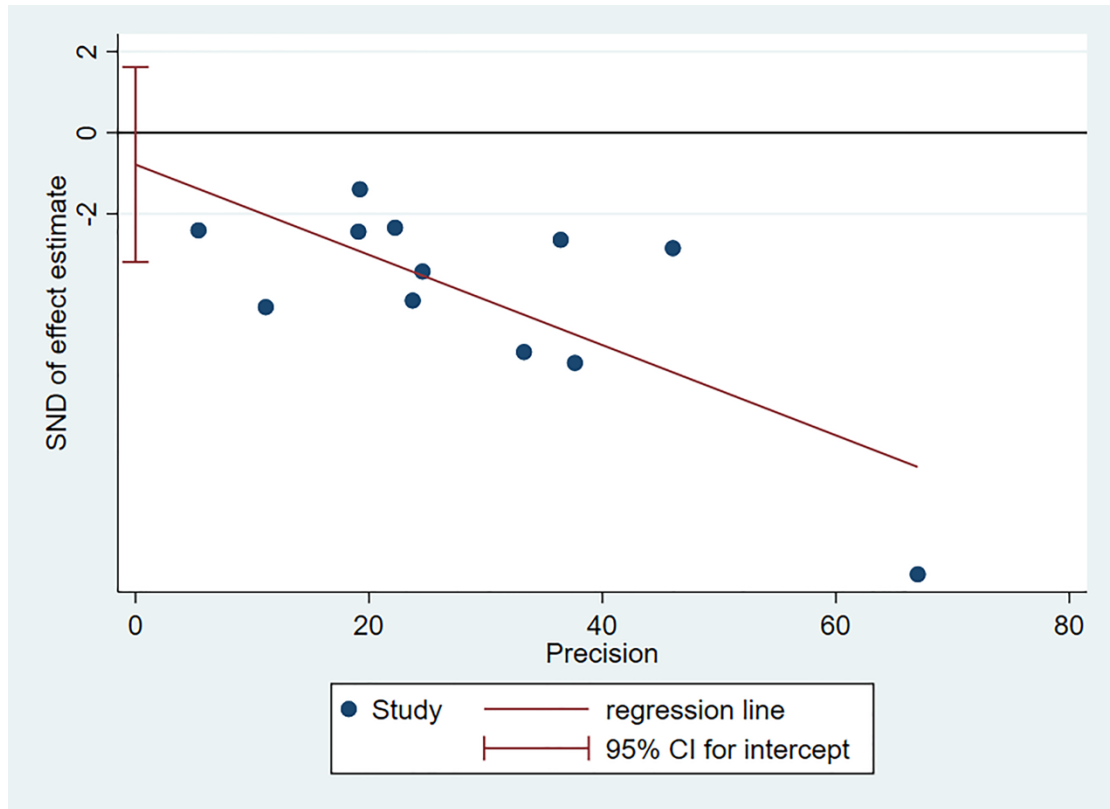

**Supplementary Fig. 8.** The funnel plot for publication bias of step count and all-cause mortality produced by Egger's test.

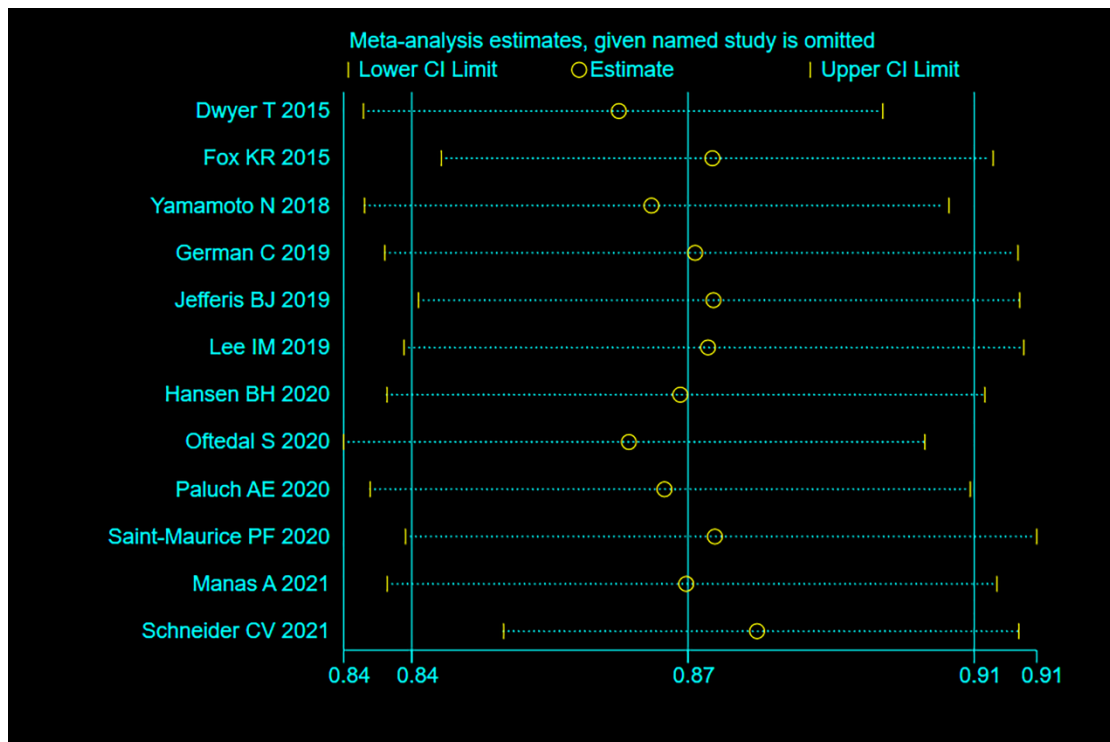

**Supplementary Fig. 9.** Sensitive analysis of step count and all-cause mortality per 1000-step



increment.

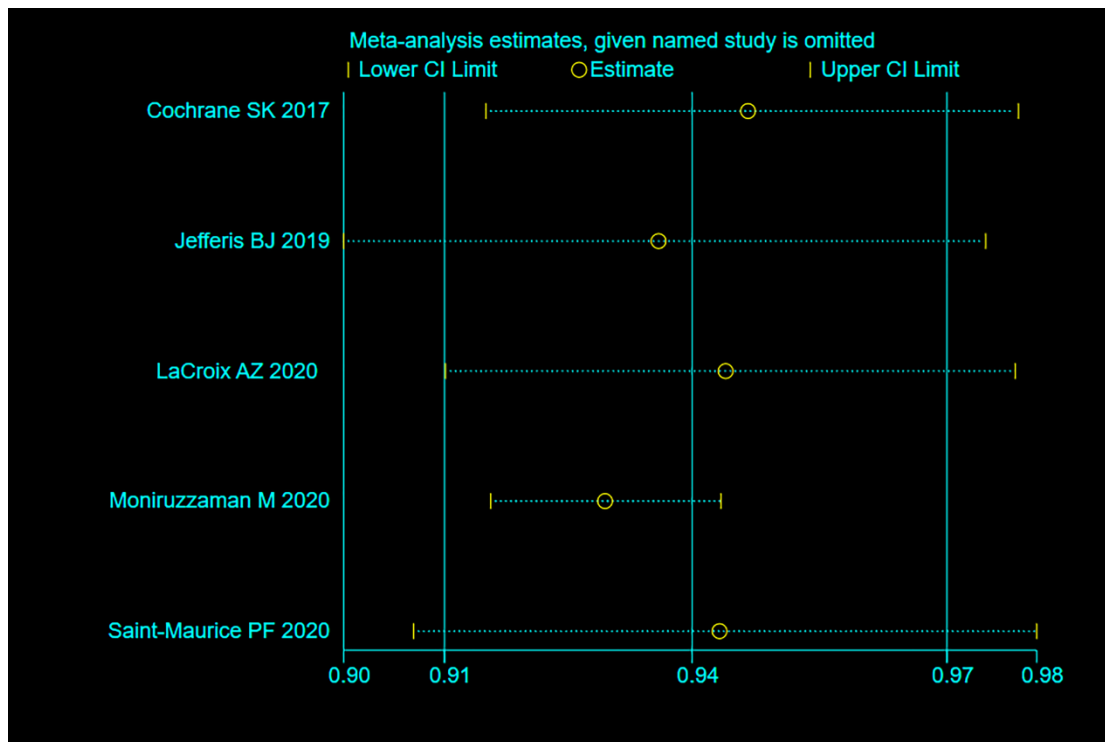

**Supplementary Fig. 10.** Sensitive analysis of step count and CVD per 500-step increment

## References

1. Wanderley FA, Silva G, Marques E, Oliveira J, Mota J, Carvalho J. Associations between objectively assessed physical activity levels and fitness and self-reported health-related quality of life in community-dwelling older adults. *Qual Life Res* 2011;**20**:1371-8. doi: 10.1007/s11136-011-9875-x.
2. German CA, McClain AC, Elfassy T. Associations between steps and years of potential life lost in the us population. *Circulation* 2019;**140**:2.
3. Hayashi F, Yokoyama T, Yoshiike N. Dietary intake and health behavior in relation to total and disease-specific mortality in Japan: an ecological analysis. *Nihon koshu eisei zasshi* 2009;**56**:633-44.[article in Japanese].
4. Slawson DC. Increased daily steps associated with reduced all-cause mortality. *Am Fam Physician* 2020;**102**:Online.
5. Schroll M, Avlund K, Davidsen M. Predictors of five-year functional ability in a longitudinal survey of men and women aged 75 to 80. The 1914-population in Glostrup, Denmark. *Aging (Milano)* 1997;**9**:143-52. doi: 10.1007/BF03340140.
6. Murphy RA, Patel KV, Kritchevsky SB, et al. Weight change, body composition, and risk of mobility disability and mortality in older adults: A population-based cohort study. *J Am Geriatr Soc* 2014;**62**:1476-83. doi: 10.1111/jgs.12954.
7. Koepfel M. Every step counts - mortality and objectively determined step count. *B&G Bewegungstherapie Und Gesundheitssport* 2020;**36**:177.[article in German].
8. Moniruzzaman M, Kadota A, Segawa H, et al. Relationship between step counts and cerebral

- small vessel disease in Japanese men. *Stroke* 2020;**51**:3584-91. doi: 10.1161/STROKEAHA.120.030141.
9. Cochrane SK, Chen SH, Fitzgerald JD, et al. Association of accelerometry-measured physical activity and cardiovascular events in mobility-limited older adults: The LIFE (lifestyle interventions and independence for elders) study. *J Am Heart Assoc* 2017;**6**:e007215. doi: 10.1161/JAHA.117.007215.
  10. German C, McClain A, Elfassy T. Steps and all-cause mortality in the US: NHANES. *Clin Cardiol* 2019:S42-S3.
  11. Paluch AE, Carnethon MR, Janet FE, et al. Association of steps per day with premature mortality: Results from the cardia study: 2007 board #7 may 28 3:45 pm - 5:45 pm. *Med Sci Sports Exerc* 2020;**52**:531-2.
  12. LaCroix AZ, Belletiere J, Di C, Lamonte MJ. Steps-per-day and cardiovascular disease mortality in older women: The OPACH study. *Circulation* 2020;**141**:A30. doi: 10.1161/circ.141.suppl\_1.30Circulation.13. Dwyer T, Pezic A, Sun C, et al. Objectively measured daily steps and subsequent long term all-cause mortality: The Tasped prospective cohort study. *PLoS One* 2015;**10**:e0141274. doi: 10.1371/journal.pone.0141274.
  14. Fox KR, Ku PW, Hillsdon M, et al. Objectively assessed physical activity and lower limb function and prospective associations with mortality and newly diagnosed disease in UK older adults: An OPAL four-year follow-up study. *Age Ageing* 2015;**44**:261-8. doi: 10.1093/ageing/afu168.
  15. Yamamoto N, Miyazaki H, Shimada M, et al. Daily step count and all-cause mortality in a sample of Japanese elderly people: A cohort study. *BMC Public Health* 2018;**18**:540. doi: 10.1186/s12889-018-5434-5.
  16. Jefferis BJ, Parsons TJ, Sartini C, et al. Objectively measured physical activity, sedentary behaviour and all-cause mortality in older men: Does volume of activity matter more than pattern of accumulation? *Br J Sports Med* 2019;**53**:1013-20. doi: 10.1136/bjsports-2017-098733.
  17. Lee IM, Shiroma EJ, Kamada M, Bassett DR, Matthews CE, Buring JE. Association of step volume and intensity with all-cause mortality in older women. *JAMA Intern Med* 2019;**179**:1105-12. doi: 10.1001/jamainternmed.2019.0899.
  18. Hansen BH, Dalene KE, Ekelund U, et al. Step by step: Association of device-measured daily steps with all-cause mortality-a prospective cohort study. *Scand J Med Sci Sports* 2020;**30**:1705-11. doi: 10.1111/sms.13726.
  19. Oftedal S, Holliday EG, Attia J, et al. Daily steps and diet, but not sleep, are related to mortality in older australians. *J Sci Med Sport* 2020;**23**:276-82. doi: 10.1016/j.jsams.2019.09.018.
  20. Saint-Maurice PF, Troiano RP, Bassett Jr DR, et al. Association of daily step count and step intensity with mortality among US adults. *JAMA* 2020;**323**:1151-60. doi: 10.1001/jama.2020.1382.
  21. Mañas A, Del Pozo Cruz B, Ekelund U, et al. Association of accelerometer-derived step volume and intensity with hospitalizations and mortality in older adults: A prospective cohort study[published online ahead of print, 2021 May 23]. *J Sport Health Sci* 2021: S2095-2546(21)00052-1. doi: 10.1016/j.jshs.2021.05.004.

22. Schneider CV, Zandvakili I, Thaiss CA, Schneider KM. Physical activity is associated with reduced risk of liver disease in the prospective UK Biobank cohort. *JHEP Rep* 2021;**3**:100263. doi: 10.1016/j.jhepr.2021.100263.
23. Jefferis BJ, Parsons TJ, Sartini C, et al. Does total volume of physical activity matter more than pattern for onset of CVD? A prospective cohort study of older British men. *Int J Cardiol* 2019;**278**:267-72. doi: 10.1016/j.ijcard.2018.12.024.
